# Supplementary material for: Untargeted UHPLC-TOF/MS Lipidomic Analysis for the Investigation of Egg Yolks after Xylanase Supplementation of the Diet of Laying Hens
Source: MDPI journal article supplement (doi:10.3390/metabo13050649), 2023-05-10
Supplement: s1 [file s1]

**Untargeted UHPLC-TOF/MS lipidomic analysis for the investigation of egg yolks after xylanase supplementation of the diet of laying hens**

**Table S1.** Level of supplementation and enzyme activities used in the present study.

| Treatment  | Level of supplementation | Intended Activity | Batch Corrected Activity | Recovered Activity in Feed |
|------------|--------------------------|-------------------|--------------------------|----------------------------|
| T1 control | 0 g/t                    | 0 U/kg            | 0 U/kg                   | 0 U/kg                     |
| T2         | 10 g/t                   | 30,000 U/kg       | 41,058 U/kg              | 35,861 U/kg                |
| T3         | 15 g/t                   | 45,000 U/kg       | 61,587 U/kg              | 57,451 U/kg                |
| T4         | 30 g/t                   | 90,000 U/kg       | 123,174 U/kg             | 111,936 U/kg               |

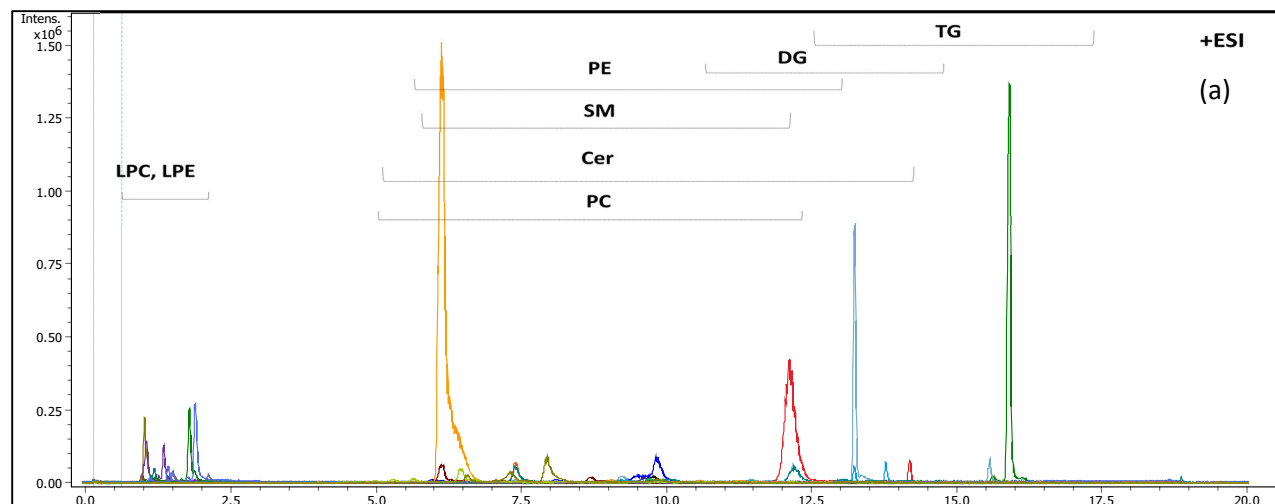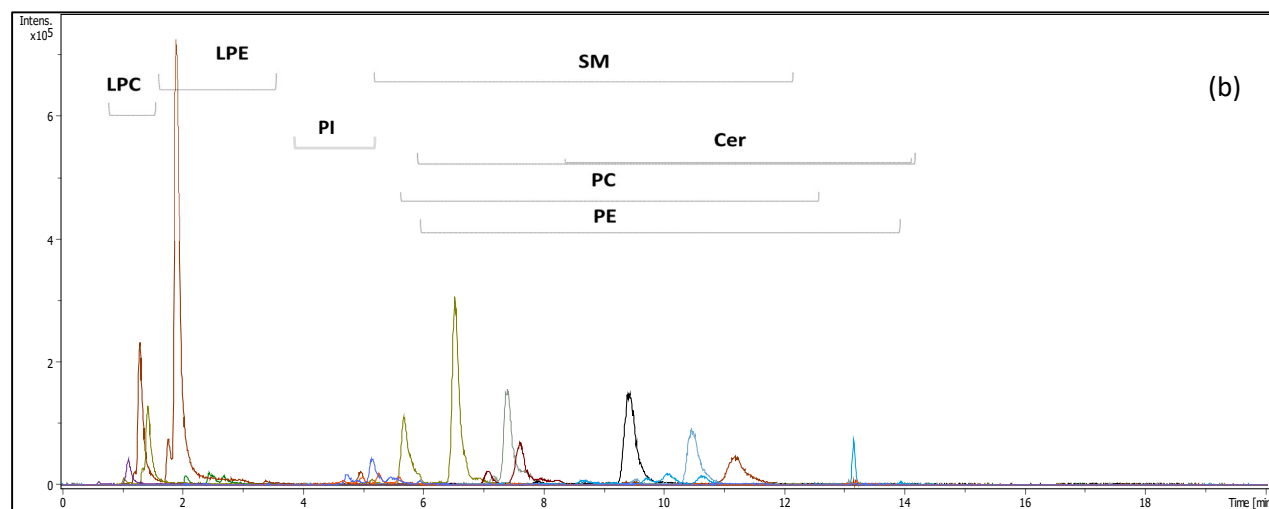

**Figure S1:** Overlaid extracted ion chromatograms of lipids present in a QC sample from different classes in (a) positive and (b) negative ESI.

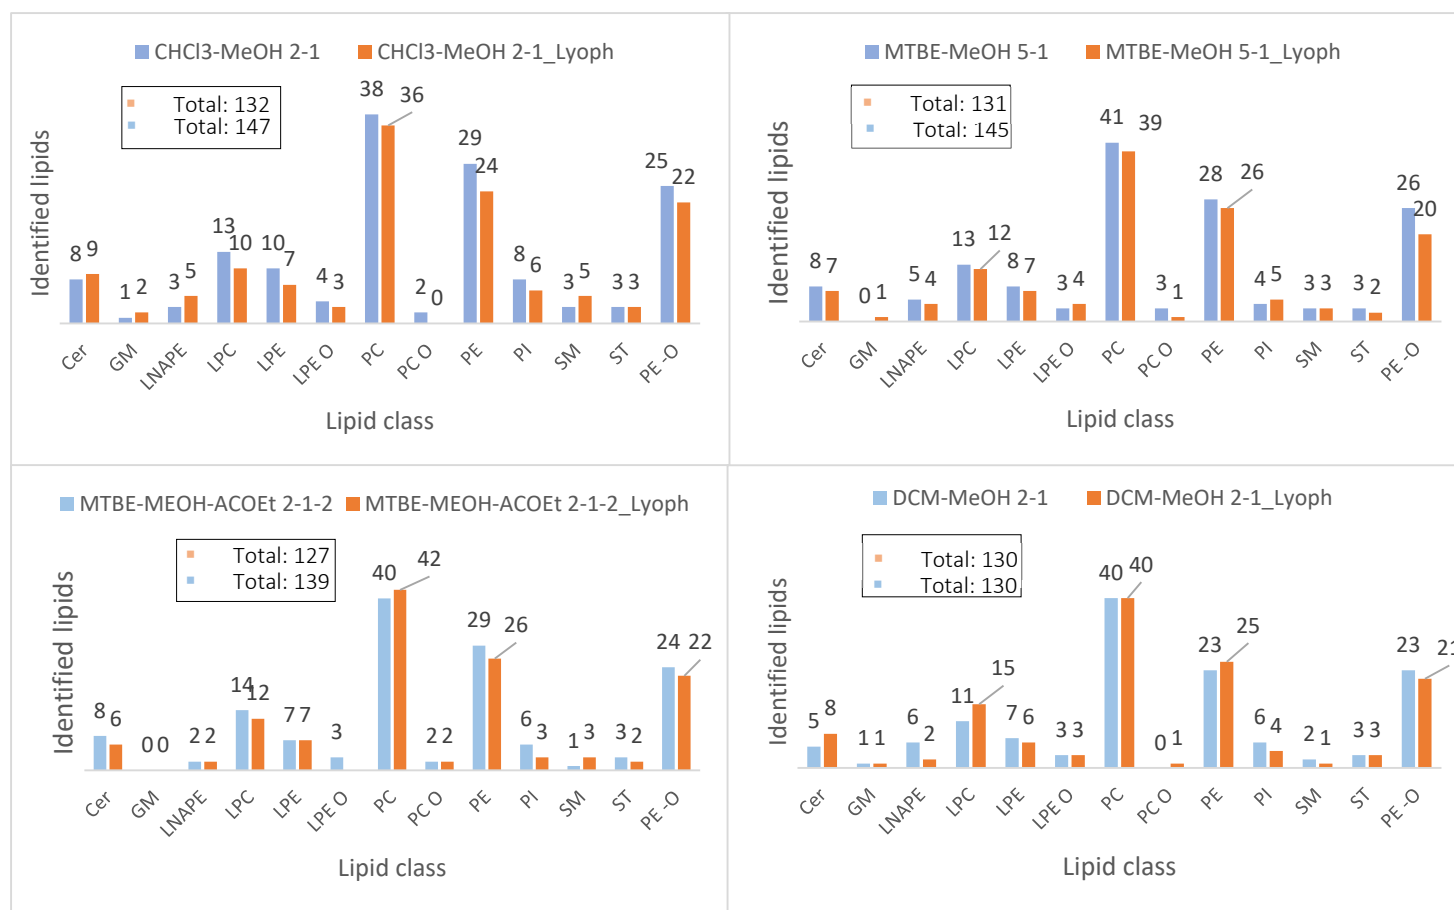

**Figure S2:** Number of identified lipids for lyophilised and non-lyophilised samples by triplicate analysis extracted with four different solvents in negative ionisation mode. Total numbers are given in the inset.

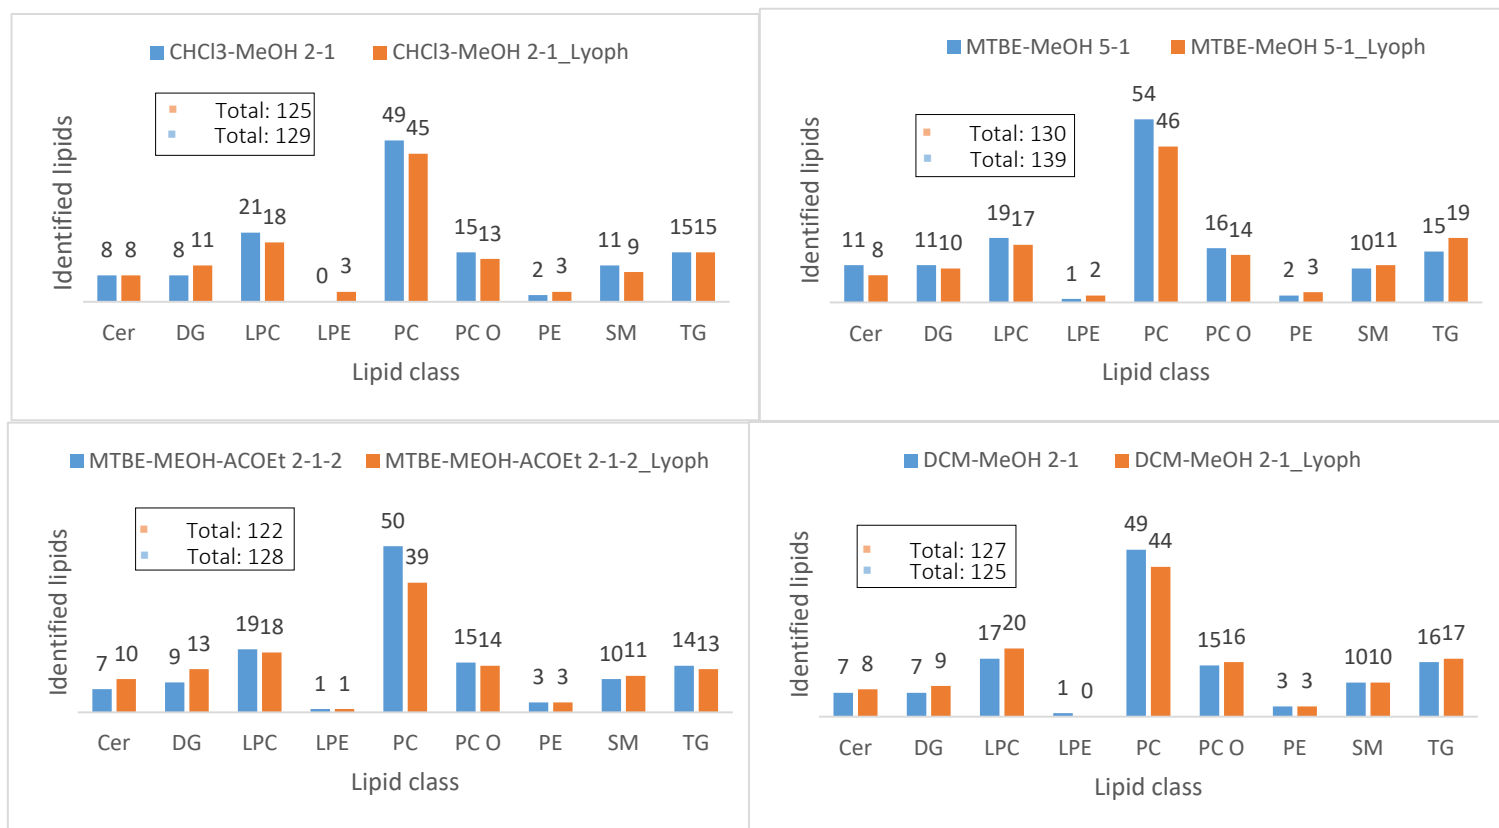

**Figure S3:** Number of identified lipids for lyophilised and non-lyophilised samples by triplicate analysis extracted with four different solvents in positive ionisation mode. Total numbers are given in the inset.

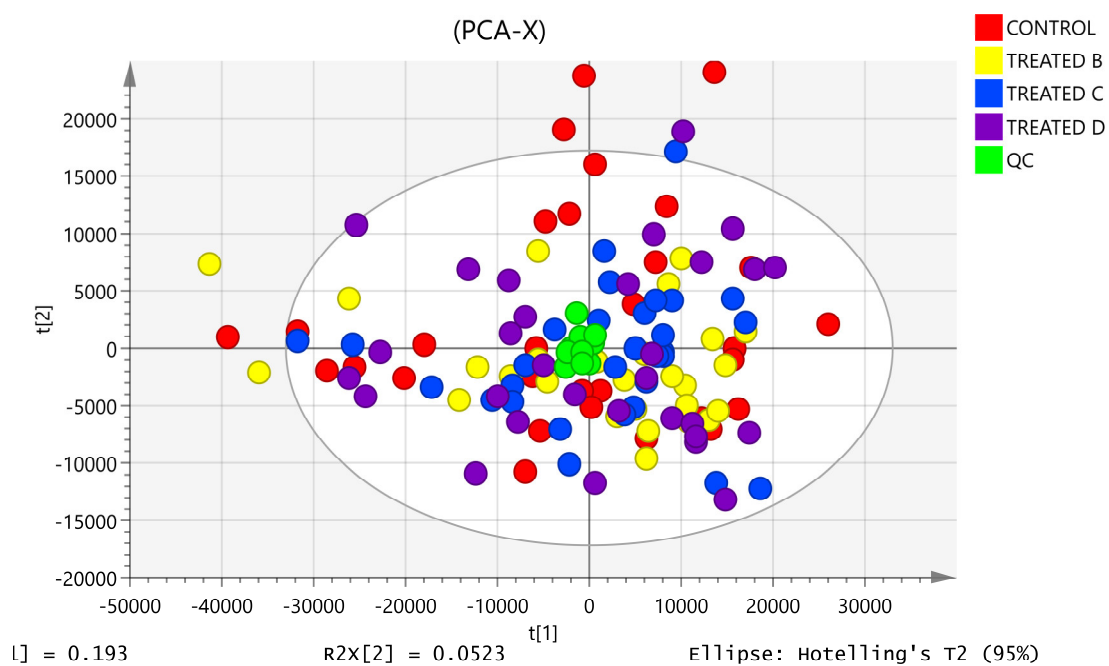

**Figure S4:** Principal component analysis (PCA) score plot of samples in negative ionisation mode showing the QC samples clustered in the centre of the plot.

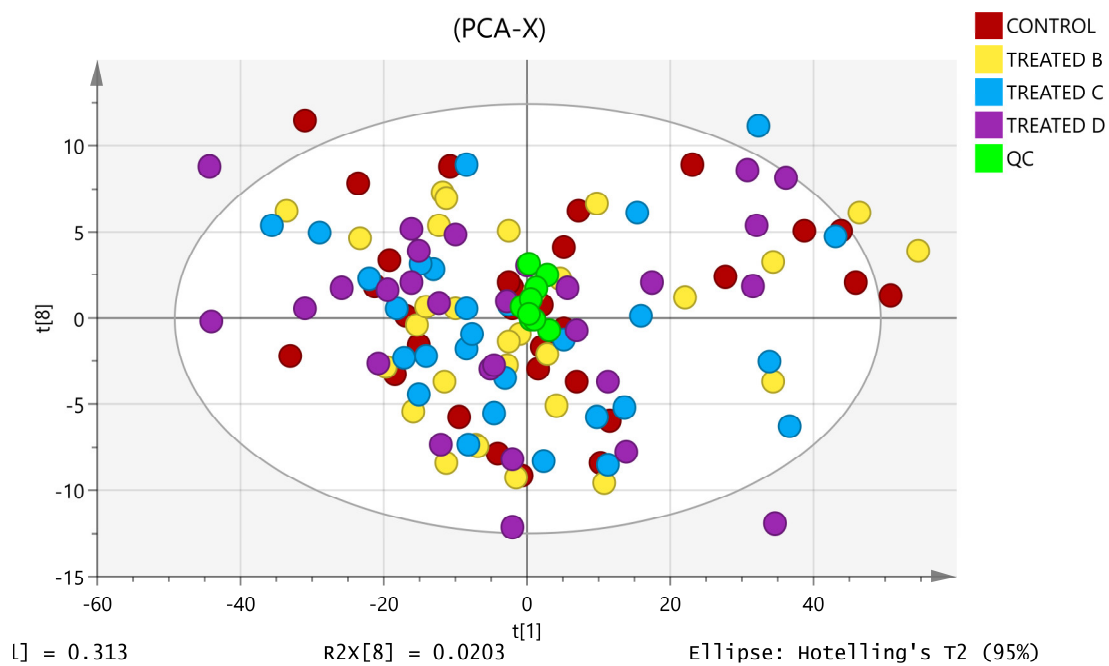

**Figure S5:** Principal component analysis (PCA) score plot of samples in positive ionisation mode showing the QC samples clustered in the centre of the plot.

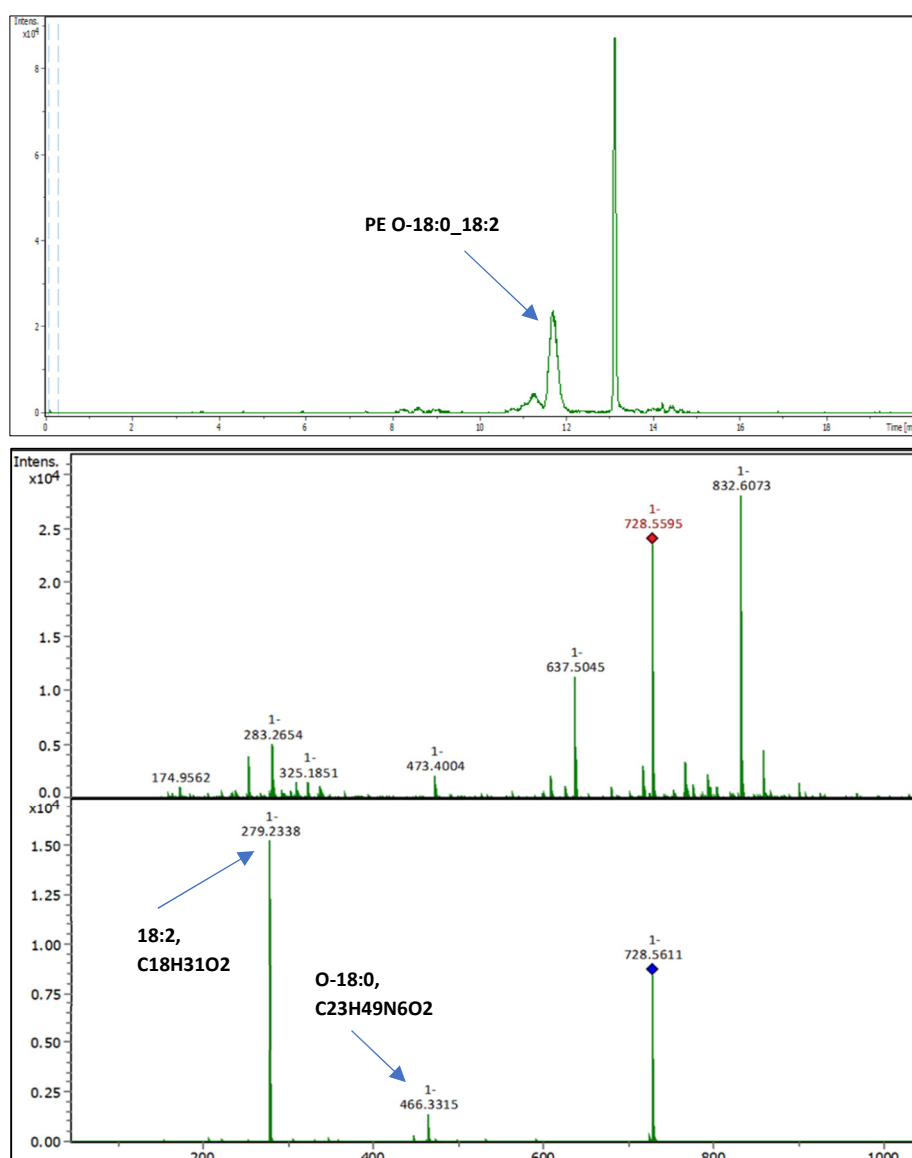

**Figure S6:** Chromatographic peak of phosphatidylethanolamine (PE O-18:0 18:2) together with MS and MS/MS spectrum. Precursor and MS fragments facilitated peak annotation.
